# Supplementary material for: A multi-walled carbon nanotube-based magnetic molecularly imprinted polymer as a highly selective sorbent for ultrasonic-assisted dispersive solid-phase microextraction of sotalol in biological fluids
Source: Royal Society of Chemistry journal article supplement (doi:10.1039/c7an02077e), 2018-01-01
Supplement: c7an02077e1.pdf [file c7an02077e1.pdf]

**Multi-walled carbon nanotube-based magnetic molecularly imprinted polymer as a highly selective sorbent for ultrasonic-assisted dispersive solid-phase microextraction of sotalol in biological fluids**

Saeedeh Ansari, Saeed Masoum \*

Department of Analytical Chemistry, Faculty of Chemistry, University of Kashan, Kashan, Iran

Corresponding author Tel.: +98 31 55912338; Fax: +98 31 55912397.

E-mail address: [masoum@kashanu.ac.ir](mailto:masoum@kashanu.ac.ir) (Saeed Masoum)

**Figure captions:**

**Fig. S1.** Chemical structures of (A) nadolol, (B) atenolol, (C) propranolol and (D) sotalol.

**Fig. S2.** Chemical structures of (A) N,N-dimethylformamide (DMF), (B) acrylamide (AM), (C) 2,2'-azoisobutyronitrile (AIBN), (D) acetic acid, and (E) ethylene glycol dimethacrylate (EGDMA).

**Fig. S3.** Nitrogen adsorption-desorption isotherms and the corresponding pore size distribution of synthesized MWCNT-MMIPs.

**Fig. S4.** Magnetization curves of (A)  $\text{Fe}_3\text{O}_4$  and (B) MWCNT-MMIPs at 25°C.

**Fig. S5.** Effect of elute solvent on the adsorption of SOT using MWCNT-MMIPs and MWCNT-MNIPs.

**Fig. S6.** Pareto chart of the effects of seven variables on yield of ER%. Variables with t-values higher than the critical value (2.77) are regarded as statistically significant.

**Fig. S7.** Reusability results of MWCNT-MMIPs.

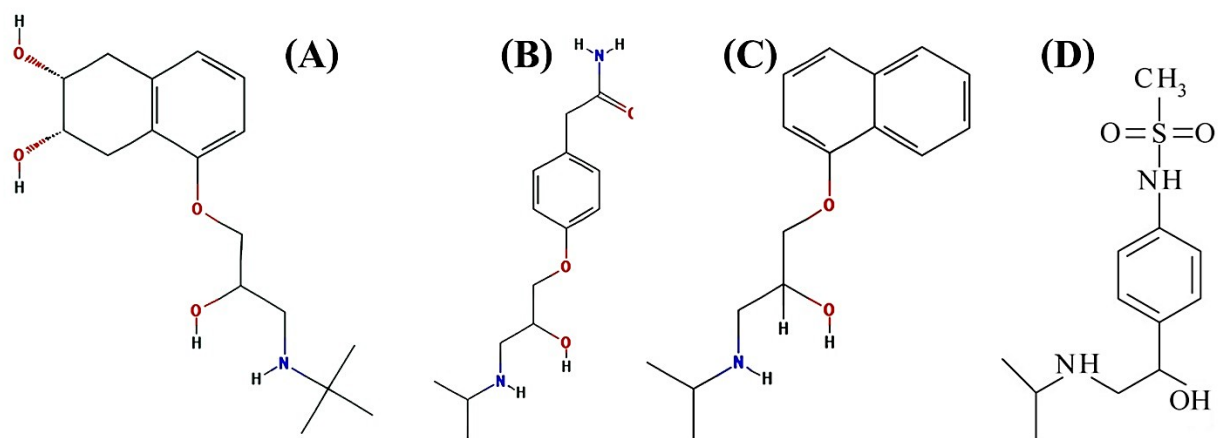

Fig. S1.

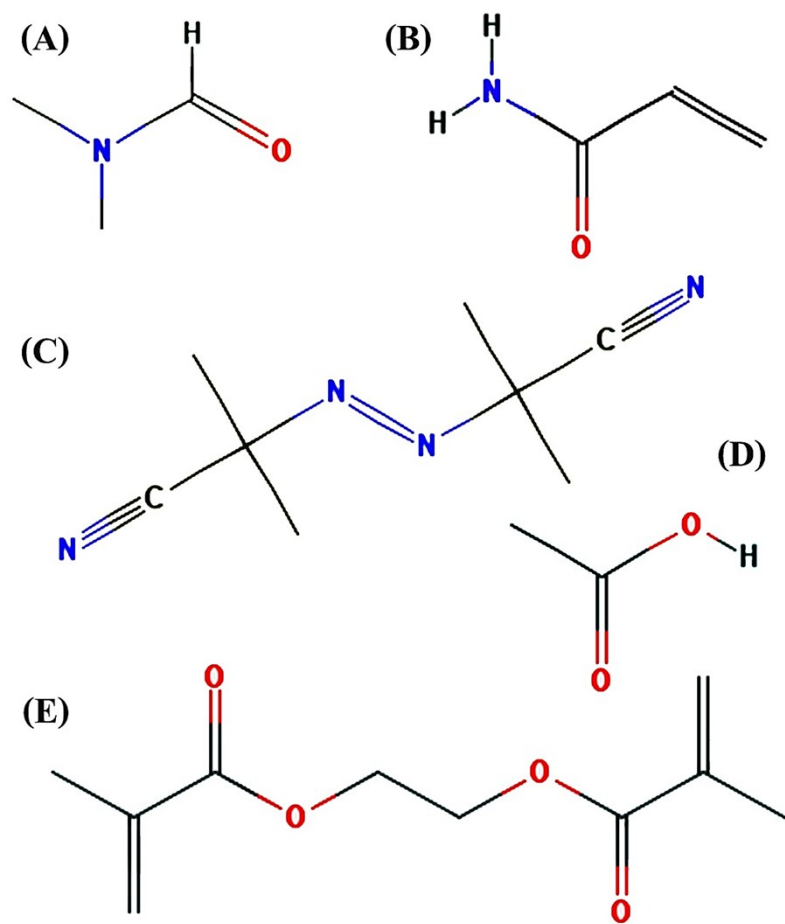

Fig. S2.

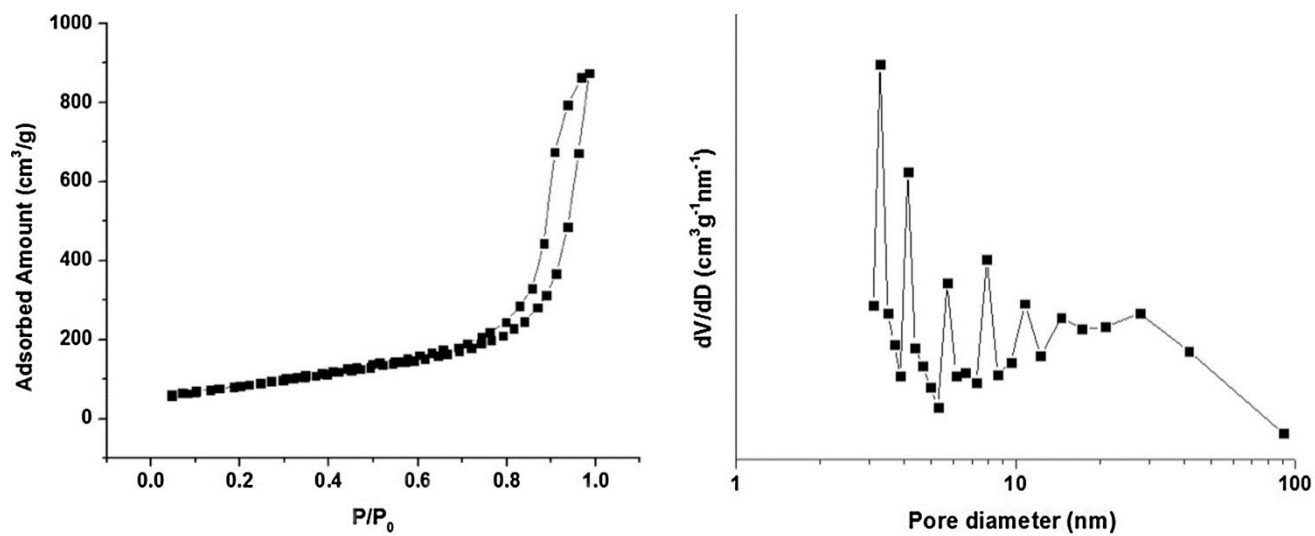

Fig. S3.

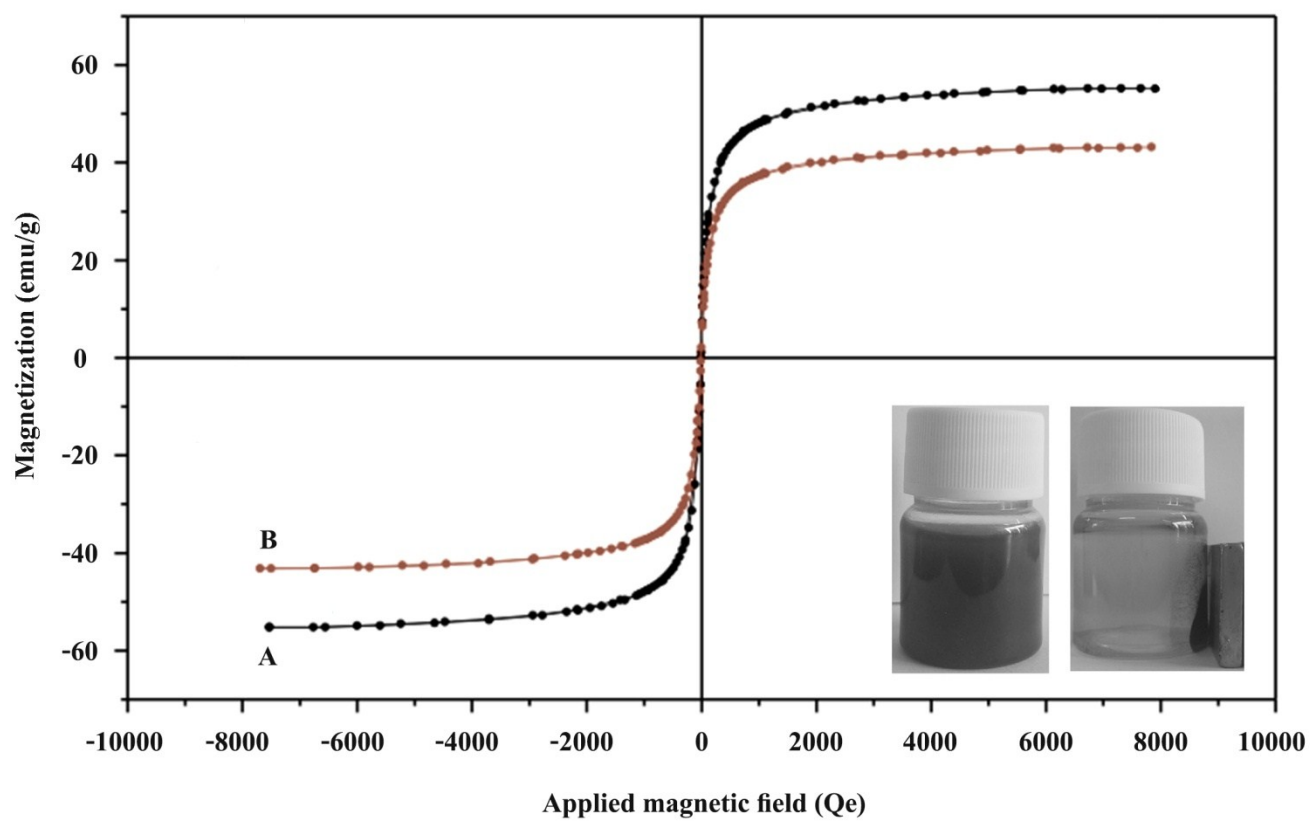

Fig. S4.

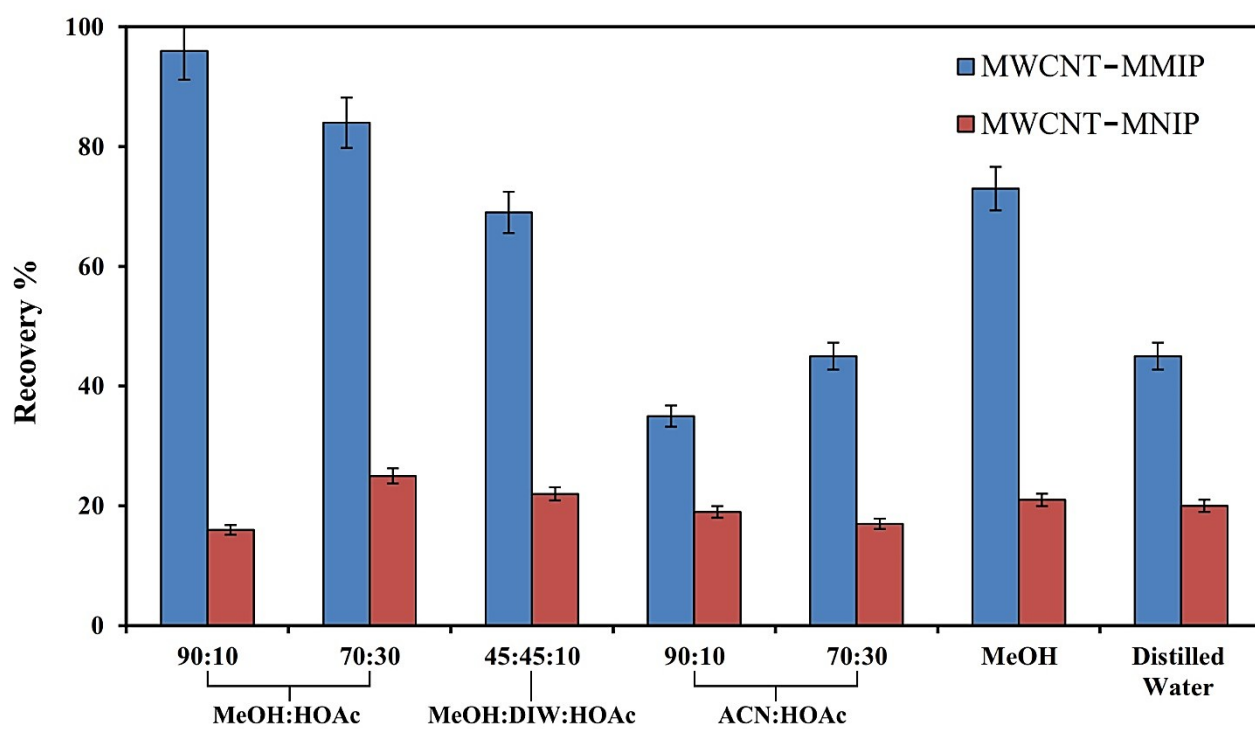

Fig. S5.

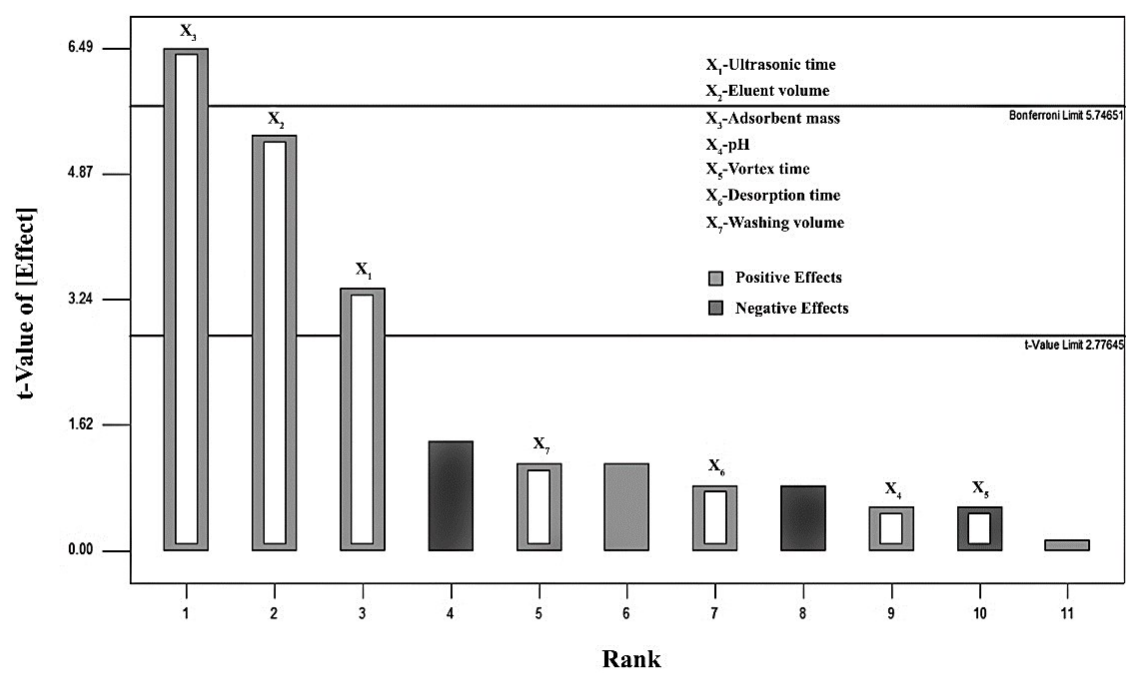

Fig. S6.



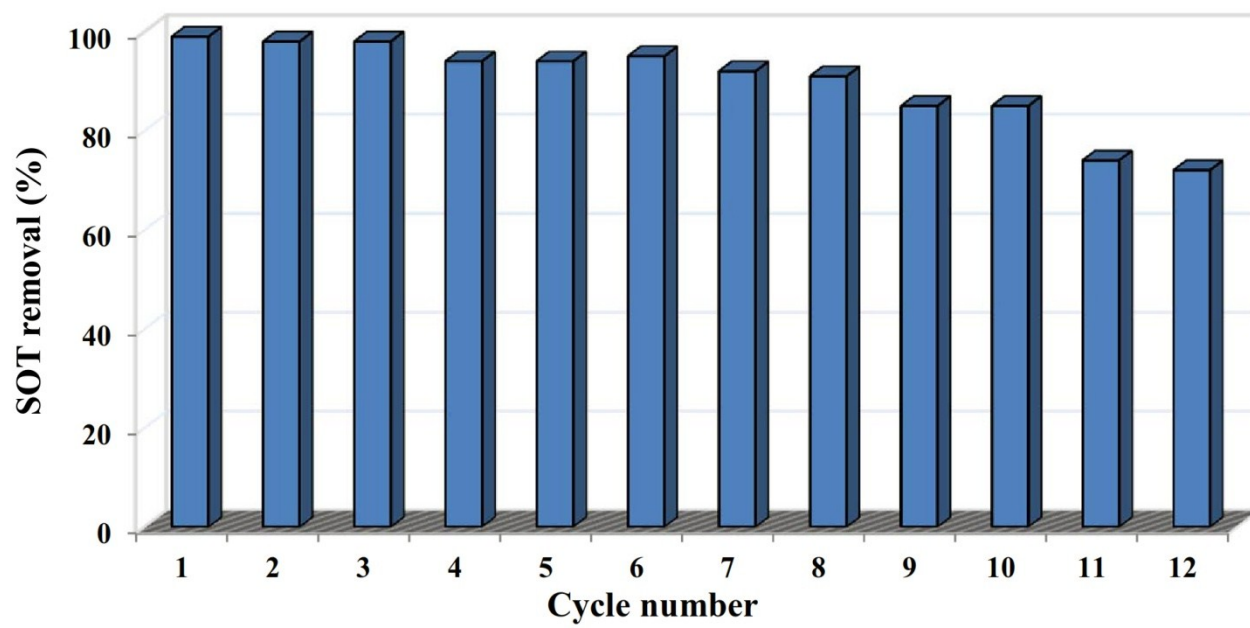

Fig. S7.

**Table S1.** Plackett–Burman design for evaluating variables influencing determination of SOT by MWCNT-MMIPs with coded values along with the observed result.

| Factors                               | Coded levels |           |
|---------------------------------------|--------------|-----------|
|                                       | Low (−1)     | High (+1) |
| X <sub>1</sub> –Ultrasonic time (min) | 2            | 6         |
| X <sub>2</sub> –Eluent volume (mL)    | 5            | 10        |
| X <sub>3</sub> –Adsorbent mass (mg)   | 10           | 20        |
| X <sub>4</sub> –pH                    | 4            | 10        |
| X <sub>5</sub> –Vortex time (min)     | 2            | 4         |
| X <sub>6</sub> –Desorption time (min) | 10           | 30        |
| X <sub>7</sub> –Washing volume (mL)   | 10           | 20        |

  

| Run | Factors        |                |                |                |                |                |                | Response |
|-----|----------------|----------------|----------------|----------------|----------------|----------------|----------------|----------|
|     | X <sub>1</sub> | X <sub>2</sub> | X <sub>3</sub> | X <sub>4</sub> | X <sub>5</sub> | X <sub>6</sub> | X <sub>7</sub> | ER%      |
| 1   | +1             | +1             | −1             | +1             | +1             | +1             | −1             | 76.12    |
| 2   | −1             | +1             | +1             | −1             | +1             | +1             | +1             | 87.50    |
| 3   | +1             | −1             | +1             | +1             | −1             | +1             | +1             | 79.45    |
| 4   | −1             | +1             | −1             | +1             | +1             | −1             | +1             | 63.33    |
| 5   | −1             | −1             | +1             | −1             | +1             | +1             | −1             | 64.75    |
| 6   | −1             | −1             | −1             | +1             | −1             | +1             | +1             | 60.10    |
| 7   | +1             | −1             | −1             | −1             | +1             | −1             | +1             | 62.45    |
| 8   | +1             | +1             | −1             | −1             | −1             | +1             | −1             | 73.50    |
| 9   | +1             | +1             | +1             | −1             | −1             | −1             | +1             | 90.10    |
| 10  | −1             | +1             | +1             | +1             | −1             | −1             | −1             | 82.30    |
| 11  | +1             | −1             | +1             | +1             | +1             | −1             | −1             | 77.55    |
| 12  | −1             | −1             | −1             | −1             | −1             | −1             | −1             | 53.05    |

**Table S2.** Effect of the molar ratio of the template molecule/functional monomer/cross-linker agent on the performance of the MWCNT-MMIPs and MWCNT-MNIPs.

| <b>Polymer</b> | <b>SOT/AM/EGDMA<br/>(molar ratio)</b> | <b><math>Q_{\text{MWCNT-MMIPs}}</math><br/>(mg/g)</b> | <b><math>Q_{\text{MWCNT-MNIPs}}</math><br/>(mg/g)</b> | <b><math>Q_{\text{MWCNT-MMIPs}}/Q_{\text{MWCNT-MNIPs}}</math></b> |
|----------------|---------------------------------------|-------------------------------------------------------|-------------------------------------------------------|-------------------------------------------------------------------|
| Polymer 1      | 1/1/5                                 | 21.15                                                 | 10.17                                                 | 2.07                                                              |
| Polymer 2      | 1/2/10                                | 24.70                                                 | 11.38                                                 | 2.17                                                              |
| Polymer 3      | 1/3/15                                | 29.08                                                 | 12.25                                                 | 2.37                                                              |
| Polymer 4      | 1/4/20                                | 31.93                                                 | 12.72                                                 | 2.51                                                              |
| Polymer 5      | 1/3/20                                | 27.69                                                 | 11.86                                                 | 2.33                                                              |
| Polymer 6      | 1/4/30                                | 29.51                                                 | 12.21                                                 | 2.40                                                              |

**Table S3.** The linearity range, calibration curves (six selected concentrations and three replicates), LOD and LOQ in standard, urine and plasma samples by the MWCNT-MMIPs.

| <b>Data</b>             | <b>External calibration</b> | <b>In urine calibration</b> | <b>In plasma calibration</b> |
|-------------------------|-----------------------------|-----------------------------|------------------------------|
| Liner range (µg/mL)     | 0.001-2                     | 0.001-2                     | 0.001-2                      |
| Regression equation     | $A=0.0061+0.0187C$          | $A=0.0083+0.0195C$          | $A=0.0105+0.0180C$           |
| Correlation coefficient | 0.9967                      | 0.9961                      | 0.9950                       |
| LOD (ng/mL)             | 0.31                        | 0.32                        | 0.34                         |
| LOQ (ng/mL)             | 1.03                        | 1.07                        | 1.13                         |
